# Supplementary material
Source: Springer Nature journal article supplement (https://www.springermedizin.de/resource/supplementary/12995_2014_288_MOESM4_ESM.pdf/9623016)
Supplement: MOESM4 [file 9623016]

**Phase 1:  
Identification**

Medline via PubMed (n = 3,214),  
PsycInfo via EBSCO (n= 2,385)  
Hand search (n=16)  
(n = 5,615)

**Phase 2:  
Screening**

Title-Abstract-  
Screening  
(n = 4,866)

Exclusion of duplicates and  
irrelevant publication types  
(n= 749)

Exclusion (n = 4,320)

Full-text articles  
assessed for eligibility  
(n = 546)

Exclusion (n = 387)

**Phase 3:  
Critical  
appraisal**

Studies included in  
qualitative analyses  
(n = 159)

Burnout/ Emotional  
Exhaustion  
n = 65\*

*Mental Disorders*  
n = 95\*

**Phase 4:  
Inclusion for  
qualitative  
synthesis**

Excluded (n = 59):  
through inadequate  
quality score (-)

*Depression*  
n = 94\*

Excluded (n = 50):  
through inadequate  
quality score (-)

n = 6\*

n = 44\*
